# Supplementary material for: Combined Bacteriophage and Antibiotic Treatment Prevents Pseudomonas aeruginosa Infection of Wild Type and cftr- Epithelial Cells
Source: Front Microbiol. 2020 Aug 26;11:1947. doi: 10.3389/fmicb.2020.01947 (PMC7479825; doi:10.3389/fmicb.2020.01947)
Supplement: Supplementary file 1 [file Data_Sheet_1.xlsx]

## Sheet: Fig 7A
Table S1. nanoString gene expression analysis in epithelial cells exposed to phage/antibiotic in absence of P. aeruginosa PAO1
		flagellin	Φ24/Φ69/CIP	Φ24/Φ69/CIP	Φ24/Φ69/CIP
		vs uninfected	vs uninfected	vs uninfected	vs uninfected
		wt cells	wt cells	CTL cells	cftr- cells
nanoString	genes up	64	10	22	2
nCounter® Inflammation panel (Human v2)	genes down	4	16	1	14
Gene annotation	gene name	log2FC	log2FC	log2FC	log2FC
2'-5'-oligoadenylate synthetase 2, 69/71kDa	OAS2	2.67297	0.0990635	0.706133	0.273265
2'-5'-oligoadenylate synthetase-like	OASL	2.62305	0.698526	0.254102	0.24756
activating transcription factor 2	ATF2	0.027642	0.213099	0.0462087	0.0927875
advanced glycosylation end product-specific receptor	AGER	4.23297	0	-1.46836	0
amphiregulin	AREG	-0.57165	0.428055	-0.0439977	0.0321347
arachidonate 12-lipoxygenase	ALOX12	0	0	0	0
arachidonate 15-lipoxygenase	ALOX15	0	0.283488	0	0
arachidonate 5-lipoxygenase	ALOX5	0.982403	-0.142929	0.235624	0.2967
arginase, liver	ARG1	0	0	0	0
baculoviral IAP repeat containing 2	BIRC2	0.287964	0.0395624	0.0580034	0.0649242
B-cell CLL/lymphoma 6	BCL6	0.730136	0.199096	-0.0690943	0.209802
BCL2-like 1	BCL2L1	-0.418	0.0761962	-0.0522159	0.286906
cAMP responsive element binding protein 1	CREB1	0.157902	0.088472	0.00556672	0.200255
CCAAT/enhancer binding protein (C/EBP), beta	CEBPB	1.13897	0.127749	0.0163706	0.438843
CD163 molecule	CD163	0	0	0	0
CD4 molecule	CD4	0	0	0.597304	0
CD40 ligand	CD40LG	0	0	0	0
CD40 molecule, TNF receptor superfamily member 5	CD40	1.2583	0.283488	0.430707	0.283445
CD55 molecule, decay accelerating factor for complement (Cromer blood group)	CD55	0.20098	-0.0384401	0.754028	0.0261049
CD86 molecule	CD86	0	0	0	0
cell division cycle 42 (GTP binding protein, 25kDa)	CDC42	-0.2496	-0.0598915	0.055828	-0.0562052
chemokine (C-C motif) ligand 11	CCL11	0	0	0	0
chemokine (C-C motif) ligand 13	CCL13	0	0	0	0
chemokine (C-C motif) ligand 16	CCL16	0	0	0	0
chemokine (C-C motif) ligand 17	CCL17	0	0	0	0
chemokine (C-C motif) ligand 19	CCL19	0	0	0	0
chemokine (C-C motif) ligand 2	CCL2	3.1638	-0.201939	4.76723	-3.0334
chemokine (C-C motif) ligand 20	CCL20	5.28225	-0.0109272	0.349332	-0.0365803
chemokine (C-C motif) ligand 21	CCL21	0	0	0	0
chemokine (C-C motif) ligand 22	CCL22	6.00968	-1.50298	0	0
chemokine (C-C motif) ligand 23	CCL23	0	0	0	0
chemokine (C-C motif) ligand 24	CCL24	3.70974	-0.301474	0	0
chemokine (C-C motif) ligand 3	CCL3	0	0	0	0
chemokine (C-C motif) ligand 4	CCL4	0	0	0	0
chemokine (C-C motif) ligand 5	CCL5	7.31943	0	0	0
chemokine (C-C motif) ligand 7	CCL7	0	0	0	0
chemokine (C-C motif) ligand 8	CCL8	0	0	0	0
chemokine (C-C motif) receptor 1	CCR1	1.51139	0	0	0
chemokine (C-C motif) receptor 2	CCR2	5.34701	-1.50298	0	0
chemokine (C-C motif) receptor 3	CCR3	0	0	0	0
chemokine (C-C motif) receptor 4	CCR4	0	0	0	0
chemokine (C-C motif) receptor 7	CCR7	0	0	0	0
chemokine (C-X-C motif) ligand 1 (melanoma growth stimulating activity, alpha)	CXCL1	4.23797	-0.00074464	0.0619404	-0.648944
chemokine (C-X-C motif) ligand 10	CXCL10	4.37206	0.698526	1.5973	1.15856
chemokine (C-X-C motif) ligand 2	CXCL2	3.12646	-0.00535122	0.195528	-0.222094
chemokine (C-X-C motif) ligand 3	CXCL3	3.24945	-0.0720096	0.199968	-0.312591
chemokine (C-X-C motif) ligand 5	CXCL5	2.51967	-0.312058	0.0440233	-0.336224
chemokine (C-X-C motif) ligand 6 (granulocyte chemotactic protein 2)	CXCL6	4.44158	-0.31766	0.236305	-1.61019
chemokine (C-X-C motif) ligand 9	CXCL9	0	0	0	0
chemokine (C-X-C motif) receptor 1	CXCR1	0	0	0	0
chemokine (C-X-C motif) receptor 2	CXCR2	0	0	0	0
chemokine (C-X-C motif) receptor 4	CXCR4	0.908269	0.143589	-0.195346	0.394623
cofilin 1 (non-muscle)	CFL1	-0.37577	-0.115213	-8.49523e-05	0.00944167
colony stimulating factor 1 (macrophage)	CSF1	1.78095	-0.590981	1.1166	-0.784861
colony stimulating factor 2 (granulocyte-macrophage)	CSF2	6.11816	3.37143	0	-0.292683
colony stimulating factor 3 (granulocyte)	CSF3	9.48501	3.28349	0	0
complement component 1, q subcomponent, A chain	C1QA	0	0	0	0
complement component 1, q subcomponent, B chain	C1QB	0	0	0	0
complement component 1, r subcomponent	C1R	2.63704	0.0276491	-0.0775745	-0.944391
complement component 1, s subcomponent	C1S	2.63967	-0.194875	0.348771	-1.16232
complement component 2	C2	0	-1.50298	2.33899	0
complement component 3	C3	1.99894	-0.15903	0.554178	0.456707
complement component 3a receptor 1	C3AR1	0	0	0	0
complement component 4A (Rodgers blood group)	C4A	-0.18031	-0.131549	0.137357	-0.102937
complement component 5	C5	-0.42114	-0.0171714	0.0490347	-0.102937
complement component 6	C6	4.93387	0	-0.0053925	0.0210517
complement component 7	C7	0	0	1.6191	-2.99275
complement component 8, alpha polypeptide	C8A	0	0	0	0
complement component 8, beta polypeptide	C8B	0	0	0	0
complement component 9	C9	0	-0.502976	0	0
complement factor B	CFB	2.13718	-0.0400059	0.193006	-0.00780495
complement factor D (adipsin)	CFD	0.083107	-1.03844	4.50419	-0.337402
C-reactive protein, pentraxin-related	CRP	3.00555	-0.438527	0.362854	0.295701
cysteinyl leukotriene receptor 1	CYSLTR1	0	0	0	0
cysteinyl leukotriene receptor 2	CYSLTR2	0	0	0	0
death-domain associated protein	DAXX	-0.11958	-0.113701	0.0246755	0.176199
defensin, alpha 1	DEFA1	0	0.283488	0	0
DNA-damage-inducible transcript 3	DDIT3	0.798687	0.438812	-0.211419	0.292841
ELK1, member of ETS oncogene family	ELK1	-0.26728	0.148839	-0.0402708	-0.185399
Fas ligand (TNF superfamily, member 6)	FASLG	0	0	0	0
FBJ murine osteosarcoma viral oncogene homolog	FOS	-0.54889	-0.189127	-0.00520977	0.289281
fms-related tyrosine kinase 1 (vascular endothelial growth factor/vascular permeability factor receptor)	FLT1	1.47924	0	0	0
FXYD domain containing ion transport regulator 2	FXYD2	-0.32117	-0.0227584	0.194986	0.112757
GNAS complex locus	GNAS	-0.21438	0.0535068	-0.0165143	0.0518392
growth factor receptor-bound protein 2	GRB2	-0.25282	-0.475504	0.689177	-0.130951
guanine nucleotide binding protein (G protein), beta polypeptide 1	GNB1	-0.15777	-0.00148893	-0.0159178	0.109634
guanine nucleotide binding protein (G protein), gamma transducing activity polypeptide 1	GNGT1	0	0	0	0
guanine nucleotide binding protein (G protein), q polypeptide	GNAQ	-0.02505	0.15372	0.233554	-0.0452215
heat shock 27kDa protein 1	HSPB1	-0.46827	-0.196505	-0.149187	-0.347874
heat shock 27kDa protein 2	HSPB2	0	0	0.597304	0
hematopoietic SH2 domain containing	HSH2D	0.863487	0.698526	-0.339081	-0.00482693
high mobility group box 1	HMGB1	-0.65409	-0.109237	0.0174195	-0.278248
high mobility group box 2	HMGB2	-0.77664	0.0424799	-0.616463	0.136529
high mobility group nucleosome binding domain 1	HMGN1	-0.37791	-0.0462643	0.0754288	-0.171532
histone deacetylase 4	HDAC4	-0.1519	-0.25708	-0.100633	0.26206
hypoxia inducible factor 1, alpha subunit (basic helix-loop-helix transcription factor)	HIF1A	0.447322	-0.412378	0.138762	-0.028738
integrin, beta 2 (complement component 3 receptor 3 and 4 subunit)	ITGB2	1.36615	0.646058	2.5973	-4.09229
interferon regulatory factor 1	IRF1	1.17186	-0.142777	0.431109	0.212565
interferon regulatory factor 3	IRF3	0.000901	0.224594	0.116598	-0.30739
interferon regulatory factor 5	IRF5	-0.34764	0.0424799	0.573456	0.119455
interferon regulatory factor 7	IRF7	1.60806	0.393113	0.159667	0.0401605
interferon, alpha 1	IFNA1	0	0	0	0
interferon, beta 1, fibroblast	IFNB1	0	0	0	0
interferon, gamma	IFNG	0	0	0	0
interferon-induced protein 44	IFI44	1.89227	-0.572122	-0.137159	0.387975
interferon-induced protein with tetratricopeptide repeats 1	IFIT1	2.58881	0.511757	-0.0484612	0.690381
interferon-induced protein with tetratricopeptide repeats 2	IFIT2	2.82935	0.283488	0.29717	0.894771
interferon-induced protein with tetratricopeptide repeats 3	IFIT3	2.4102	0.113563	1.32305	0.392146
interleukin 1 receptor accessory protein	IL1RAP	-0.22466	0.355026	-0.0107377	0.111814
interleukin 1 receptor antagonist	IL1RN	-0.27352	0.071814	0.247068	0.0873942
interleukin 1 receptor, type I	IL1R1	-0.43298	-0.482047	0.0341359	-0.219347
interleukin 1, alpha	IL1A	4.40219	-0.34878	0	0
interleukin 1, beta	IL1B	5.48027	0.163194	0	0
interleukin 10	IL10	-1.12274	-2.8249	0	0
interleukin 10 receptor, beta	IL10RB	0.472165	0.142183	-0.0926651	-0.155713
interleukin 11	IL11	4.9923	-0.165819	1.5973	0
interleukin 12A (natural killer cell stimulatory factor 1, cytotoxic lymphocyte maturation factor 1, p35)	IL12A	3.44748	-2.08794	-0.468364	-1.29268
interleukin 12B (natural killer cell stimulatory factor 2, cytotoxic lymphocyte maturation factor 2, p40)	IL12B	0	0	0	0
interleukin 13	IL13	2.88049	2.37143	0	0
interleukin 15	IL15	0.594645	-0.427005	0.379632	-1.11828
interleukin 17A	IL17A	-0.42094	0	0.597304	0
interleukin 18 (interferon-gamma-inducing factor)	IL18	-0.5694	-0.073834	0.134116	-0.393507
interleukin 18 receptor accessory protein	IL18RAP	0	0	0	0
interleukin 2	IL2	0	0	0	0
interleukin 21	IL21	0	0	0	0
interleukin 22	IL22	0	0	0	0
interleukin 22 receptor, alpha 2	IL22RA2	0	0	0	0
interleukin 23 receptor	IL23R	0	-2.08794	2.18227	-1.29268
interleukin 23, alpha subunit p19	IL23A	5.34701	-1.56451	0	0
interleukin 3 (colony-stimulating factor, multiple)	IL3	0	0	0	0
interleukin 4	IL4	0	-2.08794	0	0
interleukin 5 (colony-stimulating factor, eosinophil)	IL5	0	0	0	0
interleukin 6 (interferon, beta 2)	IL6	3.64846	0.727095	-0.20533	1.13653
interleukin 6 receptor	IL6R	-0.93676	0.119989	0.365626	-0.600437
interleukin 7	IL7	0.713348	3.10839	2.18227	-1.87765
interleukin 8	IL8	3.59817	0.37357	0.246341	-0.776447
interleukin 9	IL9	2.88049	-0.502976	0	0
jun proto-oncogene	JUN	-0.00556	-0.229525	-0.104894	0.137481
kelch-like ECH-associated protein 1	KEAP1	0.277458	-0.442337	-0.417738	0.136529
kininogen 1	KNG1	0	0	0	0
leukotriene B4 receptor	LTB4R	0.993245	0.983928	1.37963	-2.50733
leukotriene B4 receptor 2	LTB4R2	-0.57714	-1.52387	0.4321	-0.185399
LIM domain kinase 1	LIMK1	-0.41377	-0.201939	0.513934	-0.0125626
lymphocyte antigen 96	LY96	-0.25555	0	2.18227	-0.922365
lymphotoxin alpha (TNF superfamily, member 1)	LTA	0	-2.50298	0	0
lymphotoxin beta (TNF superfamily, member 3)	LTB	7.51842	-0.716512	0	0
major histocompatibility complex, class II, DR alpha	HLA-DRA	0.720114	0.0498157	0.108895	-0.332378
major histocompatibility complex, class II, DR beta 1	HLA-DRB1	0.402384	-0.0454605	0.373807	-0.120467
mannan-binding lectin serine peptidase 1 (C4/C2 activating component of Ra-reactive factor)	MASP1	-3.00885	-2.08794	1.5973	-0.337402
mannan-binding lectin serine peptidase 2	MASP2	0	0	0.597304	0
mannose receptor, C type 1	MRC1	0	0	0	0
mannose-binding lectin (protein C) 2, soluble	MBL2	0	0	0	0
MAP kinase interacting serine/threonine kinase 1	MKNK1	-0.01148	0.0464488	0.265902	-0.185399
matrix metallopeptidase 3 (stromelysin 1, progelatinase)	MMP3	0	0	0	0
matrix metallopeptidase 9 (gelatinase B, 92kDa gelatinase, 92kDa type IV collagenase)	MMP9	0	0	0.597304	0
MEF2BNB-MEF2B readthrough	MEF2BNB-MEF2B	0.760058	-0.502976	1.1166	0
mitogen-activated protein kinase 1	MAPK1	-0.29071	0.125015	0.0506302	-0.0514979
mitogen-activated protein kinase 14	MAPK14	-0.08533	0.224375	0.132195	0.0923049
mitogen-activated protein kinase 3	MAPK3	-0.235	0.204261	0.154438	0.264048
mitogen-activated protein kinase 8	MAPK8	0.409692	0.176299	0.230705	0.0786848
mitogen-activated protein kinase kinase 1	MAP2K1	0.33244	0.103549	-0.166709	0.011161
mitogen-activated protein kinase kinase 4	MAP2K4	0.05321	0.0693632	-0.198275	-0.0193892
mitogen-activated protein kinase kinase 6	MAP2K6	0.81406	-0.25354	-0.579396	-0.244293
mitogen-activated protein kinase kinase kinase 1, E3 ubiquitin protein ligase	MAP3K1	-0.06388	0.106295	0.223004	-0.208483
mitogen-activated protein kinase kinase kinase 5	MAP3K5	0.094496	0.423969	-0.0130631	-0.0262006
mitogen-activated protein kinase kinase kinase 7	MAP3K7	-0.07544	0.235233	0.202452	-0.0922898
mitogen-activated protein kinase kinase kinase 9	MAP3K9	0.362037	1.19038	-0.361449	-0.474906
mitogen-activated protein kinase-activated protein kinase 2	MAPKAPK2	-0.0967	-0.162647	0.307075	-0.382782
mitogen-activated protein kinase-activated protein kinase 5	MAPKAPK5	-0.09614	0.0338741	0.0652126	-0.0212105
MYC associated factor X	MAX	0.032839	0.00951316	0.0844858	0.212285
myeloid differentiation primary response gene (88)	MYD88	0.17863	-0.19185	0.192149	-0.113249
myocyte enhancer factor 2A	MEF2A	0.042695	0.10495	0.259015	-0.189778
myocyte enhancer factor 2C	MEF2C	-1.51968	0.152243	0.460552	0.0316989
myocyte enhancer factor 2D	MEF2D	0.180377	0.186464	0.346421	-0.114015
myosin, light chain 2, regulatory, cardiac, slow	MYL2	0	0.786464	0	0
myxovirus (influenza virus) resistance 1, interferon-inducible protein p78 (mouse)	MX1	2.40711	-0.32154	0.218043	0.591957
myxovirus (influenza virus) resistance 2 (mouse)	MX2	2.54515	0.546522	2.33899	0.429311
NADPH oxidase 1	NOX1	2.0883	3.59382	0	0
nitric oxide synthase 2, inducible	NOS2	3.57082	-0.716512	0	0
NLR family, pyrin domain containing 3	NLRP3	0	0	0.597304	0
nuclear factor (erythroid-derived 2)-like 2	NFE2L2	0.272482	0.00557099	-0.0903644	0.227528
nuclear factor of activated T-cells, cytoplasmic, calcineurin-dependent 3	NFATC3	-0.02364	-0.17337	0.00860078	-0.120444
nuclear factor of kappa light polypeptide gene enhancer in B-cells 1	NFKB1	0.54305	0.00785359	0.562662	0.243444
nuclear receptor subfamily 3, group C, member 1 (glucocorticoid receptor)	NR3C1	-0.0113	0.144809	0.0727104	0.107322
nucleotide-binding oligomerization domain containing 1	NOD1	-0.06647	1.45341	1.85356	-0.533322
nucleotide-binding oligomerization domain containing 2	NOD2	5.13844	0	0	-0.770362
oxoeicosanoid (OXE) receptor 1	OXER1	0	0	1.5973	0
phosphatidylinositol-4-phosphate 3-kinase, catalytic subunit type 2 gamma	PIK3C2G	-0.28043	0.145985	0.128876	0.272806
phospholipase A2, group IVA (cytosolic, calcium-dependent)	PLA2G4A	0.264667	-0.209921	0.303684	-0.270288
phospholipase C, beta 1 (phosphoinositide-specific)	PLCB1	-0.60377	1.86845	0.853564	-0.000974605
platelet-derived growth factor alpha polypeptide	PDGFA	0.26344	0.376597	0.0462087	0.433511
prostaglandin D2 receptor 2	PTGDR2	0	-0.502976	0	0
prostaglandin E receptor 1 (subtype EP1), 42kDa	PTGER1	0	0	0	0
prostaglandin E receptor 2 (subtype EP2), 53kDa	PTGER2	1.21206	1.50588	0	-1.87765
prostaglandin E receptor 3 (subtype EP3)	PTGER3	0	0	0	0
prostaglandin E receptor 4 (subtype EP4)	PTGER4	0.561272	-0.18858	0.701561	-0.829255
prostaglandin F receptor (FP)	PTGFR	-2.67166	1.28349	0.597304	-1.87765
prostaglandin I2 (prostacyclin) receptor (IP)	PTGIR	0	0	0	0
prostaglandin-endoperoxide synthase 1 (prostaglandin G/H synthase and cyclooxygenase)	PTGS1	3.57774	0.786464	0	-1.29268
prostaglandin-endoperoxide synthase 2 (prostaglandin G/H synthase and cyclooxygenase)	PTGS2	3.85324	0.209233	0.438526	-0.22625
protein kinase C, alpha	PRKCA	0.307785	0.461275	0.352312	-0.113608
protein kinase C, beta	PRKCB	1.97527	0	1.5973	0
protein phosphatase 1, regulatory subunit 12B	PPP1R12B	0.322714	0.090843	0.183712	-0.0743679
PTK2 protein tyrosine kinase 2	PTK2	0.06049	0.0633039	0.176945	0.0385343
Rap guanine nucleotide exchange factor (GEF) 2	RAPGEF2	0.339005	-0.0864616	0.197216	-0.666526
ras homolog family member A	RHOA	-0.31627	-0.0796778	-0.322514	-0.132932
ras-related C3 botulinum toxin substrate 1 (rho family, small GTP binding protein Rac1)	RAC1	0.01577	0.0369171	-0.0690853	0.0564464
receptor (TNFRSF)-interacting serine-threonine kinase 1	RIPK1	-0.02476	0.0980745	0.171304	-0.24328
receptor-interacting serine-threonine kinase 2	RIPK2	1.17805	-0.0287249	-0.0827108	0.0586358
Rho-associated, coiled-coil containing protein kinase 2	ROCK2	-0.25573	0.307401	0.228921	-0.0462364
ribosomal protein S6 kinase, 90kDa, polypeptide 5	RPS6KA5	-0.11681	0.314683	-0.00441737	-0.205299
SHC (Src homology 2 domain containing) transforming protein 1	SHC1	-0.05852	0.137473	0.063418	0.193687
signal transducer and activator of transcription 1, 91kDa	STAT1	1.13631	0.0244008	-0.0104412	0.128459
signal transducer and activator of transcription 2, 113kDa	STAT2	0.650556	0.120838	0.279961	-0.0238376
signal transducer and activator of transcription 3 (acute-phase response factor)	STAT3	0.987844	0.131256	0.048404	0.165841
SMAD family member 7	SMAD7	0.149314	-0.0242462	0.556727	-0.161552
thromboxane A2 receptor	TBXA2R	0	0	0	0
thymic stromal lymphopoietin	TSLP	0	0.572995	0.597304	0
TNF receptor-associated factor 2	TRAF2	0.025751	0.102916	0.132028	-0.142964
TNFRSF1A-associated via death domain	TRADD	0.470707	-0.079082	-0.298439	0.229638
toll interacting protein	TOLLIP	-0.06666	0.0980564	-0.00933896	0.0210517
toll-like receptor 1	TLR1	0.453778	-0.131549	1.20149	-0.458418
toll-like receptor 2	TLR2	3.99749	-1.03844	-0.361449	-2.37804
toll-like receptor 3	TLR3	1.19765	-0.0950236	0.0145771	-0.262878
toll-like receptor 4	TLR4	0	-2.08794	0.597304	0
toll-like receptor 5	TLR5	0.342238	-0.0451347	0.127739	-0.359897
toll-like receptor 6	TLR6	3.36026	-2.50298	1.5973	0
toll-like receptor 7	TLR7	0	-2.08794	0	0
toll-like receptor 8	TLR8	0	0	0	0
toll-like receptor 9	TLR9	0	0	0	0
transcription factor 4	TCF4	0	0	0	0
transforming growth factor, beta 1	TGFB1	-0.0697	0.0787145	-0.00166485	-0.129401
transforming growth factor, beta 2	TGFB2	-0.41673	-0.255671	0.348771	-0.646533
transforming growth factor, beta 3	TGFB3	0.717215	0	0	0
transforming growth factor, beta receptor 1	TGFBR1	0.138328	0.158861	0.0841766	-0.68365
triggering receptor expressed on myeloid cells 2	TREM2	0	0	0	0
tumor necrosis factor	TNF	4.68191	0	1.5973	0
tumor necrosis factor (ligand) superfamily, member 14	TNFSF14	3.43243	0	0	0
tumor necrosis factor, alpha-induced protein 3	TNFAIP3	2.65205	-0.421505	0.724281	0.0296137
twist homolog 2 (Drosophila)	TWIST2	0	0	0	0
TYRO protein tyrosine kinase binding protein	TYROBP	0	-0.502976	0	0
v-Ha-ras Harvey rat sarcoma viral oncogene homolog	HRAS	-0.19951	-0.368589	-0.063108	-0.337402
v-maf musculoaponeurotic fibrosarcoma oncogene homolog F (avian)	MAFF	1.01884	0.248827	-0.161703	0.076141
v-maf musculoaponeurotic fibrosarcoma oncogene homolog G (avian)	MAFG	0.23391	0.215743	0.116598	0.333975
v-maf musculoaponeurotic fibrosarcoma oncogene homolog K (avian)	MAFK	0.199245	0.138525	-0.0543264	0.269628
v-myc myelocytomatosis viral oncogene homolog (avian)	MYC	-0.63848	0.0961946	-0.0340809	-0.469192
v-raf-1 murine leukemia viral oncogene homolog 1	RAF1	0.011988	-0.0398607	0.16271	0.0786624
v-rel reticuloendotheliosis viral oncogene homolog A (avian)	RELA	0.279598	0.31071	0.473219	0.297101
v-rel reticuloendotheliosis viral oncogene homolog B	RELB	1.02199	0.143763	0.144612	-0.203547
Interleukins
Chemokines, colony stimulating factors
Toll like receptors

## Sheet: Fig 7B
Table S2. nanoString gene expression analysis in epithelial cells exposed to phage/antibiotic in presence of P. aeruginosa PAO1
		PA01+ Φ24/Φ69/CIP	PA01+ Φ24/Φ69/CIP	PA01+ Φ24/Φ69/CIP	PA01+ Φ24/Φ69/CIP
		vs uninfected	vs uninfected	vs uninfected	vs uninfected
		CTL cells at 24h	cftr- cells at 24h	CTL cells at 72h	cftr- cells at 72h
nanoString	genes up	48	62	39	61
nCounter® Inflammation panel (Human v2)	genes down	10	10	20	7
Gene annotation	gene name	log2FC	log2FC	log2FC	log2FC
2'-5'-oligoadenylate synthetase 2, 69/71kDa	OAS2	3.19244	3.10264	-1.65636	2.31138
2'-5'-oligoadenylate synthetase-like	OASL	1.40394	2.87992	-1.01299	2.27265
activating transcription factor 2	ATF2	-0.098693	0.168829	0.0181963	-0.219162
advanced glycosylation end product-specific receptor	AGER	-2.06567	0	0	0
amphiregulin	AREG	-0.151721	0.484433	-0.587647	0.110601
arachidonate 12-lipoxygenase	ALOX12	0	0	0	0
arachidonate 15-lipoxygenase	ALOX15	0	0	0	0
arachidonate 5-lipoxygenase	ALOX5	0.786572	0.853228	0.414097	0.538906
arginase, liver	ARG1	0	0	0	0
baculoviral IAP repeat containing 2	BIRC2	-0.237407	0.825999	0.357198	0.319978
B-cell CLL/lymphoma 6	BCL6	0.174723	0.375071	0.324158	0.565238
BCL2-like 1	BCL2L1	-0.312423	0.15745	-0.114264	0.0177596
cAMP responsive element binding protein 1	CREB1	-0.148598	0.573941	0.278243	0.208273
CCAAT/enhancer binding protein (C/EBP), beta	CEBPB	0.505336	1.06618	0.541263	0.537234
CD163 molecule	CD163	0	0	0	0
CD4 molecule	CD4	0	0	0	0
CD40 ligand	CD40LG	0	0	0	0
CD40 molecule, TNF receptor superfamily member 5	CD40	0.564781	1.65621	0.453058	1.42679
CD55 molecule, decay accelerating factor for complement (Cromer blood group)	CD55	-1.58156	-0.33559	-0.43301	0.764687
CD86 molecule	CD86	0	0	0	0
cell division cycle 42 (GTP binding protein, 25kDa)	CDC42	-0.201244	0.100344	-0.0634606	0.0238132
chemokine (C-C motif) ligand 11	CCL11	0	0	0	0
chemokine (C-C motif) ligand 13	CCL13	0	0	0	0
chemokine (C-C motif) ligand 16	CCL16	0	2.62006	0	0
chemokine (C-C motif) ligand 17	CCL17	0	0	0	0
chemokine (C-C motif) ligand 19	CCL19	0	0	0	0
chemokine (C-C motif) ligand 2	CCL2	6.30939	3.92563	5.23494	4.81199
chemokine (C-C motif) ligand 20	CCL20	5.92804	6.27366	5.63291	4.98224
chemokine (C-C motif) ligand 21	CCL21	0	0	0	0
chemokine (C-C motif) ligand 22	CCL22	4.03255	6.81645	0	4.52356
chemokine (C-C motif) ligand 23	CCL23	0	0	0	0
chemokine (C-C motif) ligand 24	CCL24	0	2.62006	2.13874	2.32193
chemokine (C-C motif) ligand 3	CCL3	0	0	0	0
chemokine (C-C motif) ligand 4	CCL4	0	2.62006	0	3.58496
chemokine (C-C motif) ligand 5	CCL5	0	7.32972	2.9461	6.55459
chemokine (C-C motif) ligand 7	CCL7	0	0	0	0
chemokine (C-C motif) ligand 8	CCL8	0	0	0	0
chemokine (C-C motif) receptor 1	CCR1	0	0	0	0
chemokine (C-C motif) receptor 2	CCR2	0	4.28302	1.13874	2.32193
chemokine (C-C motif) receptor 3	CCR3	0	0	0	0
chemokine (C-C motif) receptor 4	CCR4	0	0	0	0
chemokine (C-C motif) receptor 7	CCR7	0	0	0	0
chemokine (C-X-C motif) ligand 1 (melanoma growth stimulating activity, alpha)	CXCL1	4.13099	4.74988	4.04081	4.54312
chemokine (C-X-C motif) ligand 10	CXCL10	8.8399	7.3429	5.6306	5.00744
chemokine (C-X-C motif) ligand 2	CXCL2	3.22029	4.16484	3.32561	3.42344
chemokine (C-X-C motif) ligand 3	CXCL3	3.25516	4.3632	3.19401	3.62341
chemokine (C-X-C motif) ligand 5	CXCL5	3.15594	3.25491	2.83134	2.68061
chemokine (C-X-C motif) ligand 6 (granulocyte chemotactic protein 2)	CXCL6	4.47872	3.75617	3.87219	3.20225
chemokine (C-X-C motif) ligand 9	CXCL9	0	0	0	0
chemokine (C-X-C motif) receptor 1	CXCR1	0	0	0	0
chemokine (C-X-C motif) receptor 2	CXCR2	0	0	0	0
chemokine (C-X-C motif) receptor 4	CXCR4	1.05652	-0.103367	0.143794	0.37914
cofilin 1 (non-muscle)	CFL1	-0.262297	0.200174	-0.257046	-0.119144
colony stimulating factor 1 (macrophage)	CSF1	2.10516	1.44728	1.219	1.31097
colony stimulating factor 2 (granulocyte-macrophage)	CSF2	5.2863	8.47712	6.09294	8.90689
colony stimulating factor 3 (granulocyte)	CSF3	6.239	9.56648	6.38667	9.25739
complement component 1, q subcomponent, A chain	C1QA	0	0	0	0
complement component 1, q subcomponent, B chain	C1QB	0	0	0	0
complement component 1, r subcomponent	C1R	1.6694	2.00701	1.99463	1.81995
complement component 1, s subcomponent	C1S	2.05403	1.26395	2.67044	2.00423
complement component 2	C2	0.851402	3.0351	1.42759	3
complement component 3	C3	2.30842	3.49243	2.51915	2.88547
complement component 3a receptor 1	C3AR1	0	0	0	0
complement component 4A (Rodgers blood group)	C4A	-0.302926	0.298805	-1.0449	-1.30201
complement component 5	C5	-1.17717	-0.626233	-0.51767	-0.992648
complement component 6	C6	-1.35805	-1.29506	-0.508848	-1.40663
complement component 7	C7	0.26644	-3.10004	-1.92291	-0.104069
complement component 8, alpha polypeptide	C8A	0	0	0	0
complement component 8, beta polypeptide	C8B	0	0	0	0
complement component 9	C9	0	0	0	0
complement factor B	CFB	2.12584	1.85844	1.39118	2.07
complement factor D (adipsin)	CFD	1.91707	-3.57952	-1.03184	2.58496
C-reactive protein, pentraxin-related	CRP	2.22465	-0.142246	1.15564	-0.876494
cysteinyl leukotriene receptor 1	CYSLTR1	2.65404	1.62006	0	0
cysteinyl leukotriene receptor 2	CYSLTR2	0	0	0	0
death-domain associated protein	DAXX	0.0161725	0.0555699	-0.115728	-0.463508
defensin, alpha 1	DEFA1	0	0.0350952	0	0
DNA-damage-inducible transcript 3	DDIT3	-0.279347	0.629598	-0.269413	0.285578
ELK1, member of ETS oncogene family	ELK1	-0.229518	-0.471713	-0.174653	-0.231448
Fas ligand (TNF superfamily, member 6)	FASLG	0	0	0	0
FBJ murine osteosarcoma viral oncogene homolog	FOS	-0.657325	-0.295556	-0.456936	-0.393461
fms-related tyrosine kinase 1 (vascular endothelial growth factor/vascular permeability factor receptor)	FLT1	0	0	0	0
FXYD domain containing ion transport regulator 2	FXYD2	-1.60072	-0.583732	-0.584796	-1.82193
GNAS complex locus	GNAS	-0.302124	-0.155376	-0.173711	-0.288388
growth factor receptor-bound protein 2	GRB2	0.520196	0.0419723	-0.390036	-0.138016
guanine nucleotide binding protein (G protein), beta polypeptide 1	GNB1	-0.448551	0.301341	-0.0887921	0.029934
guanine nucleotide binding protein (G protein), gamma transducing activity polypeptide 1	GNGT1	0	0	0	0
guanine nucleotide binding protein (G protein), q polypeptide	GNAQ	-0.0316418	0.161125	-0.356356	-0.340509
heat shock 27kDa protein 1	HSPB1	-0.719885	-0.6361	-0.472249	-0.734612
heat shock 27kDa protein 2	HSPB2	0	0	0	0
hematopoietic SH2 domain containing	HSH2D	0.0213271	0.812801	-0.50133	0.65598
high mobility group box 1	HMGB1	-0.364891	-0.317459	-0.631779	-0.240181
high mobility group box 2	HMGB2	-1.33622	-0.859039	-0.955741	0.301188
high mobility group nucleosome binding domain 1	HMGN1	-0.330565	-0.169243	-0.204282	0.00174903
histone deacetylase 4	HDAC4	-0.195904	-0.0165799	-0.887286	0.326565
hypoxia inducible factor 1, alpha subunit (basic helix-loop-helix transcription factor)	HIF1A	0.550176	1.08447	0.45179	1.15747
integrin, beta 2 (complement component 3 receptor 3 and 4 subunit)	ITGB2	2.65404	-0.257588	1.54306	1.19849
interferon regulatory factor 1	IRF1	1.82809	3.44155	1.63692	2.38797
interferon regulatory factor 3	IRF3	-0.411632	-0.219114	-0.106749	0.207133
interferon regulatory factor 5	IRF5	-0.463471	-0.175126	-0.272852	-0.461003
interferon regulatory factor 7	IRF7	1.24995	1.72567	-0.523025	1.00989
interferon, alpha 1	IFNA1	0	0	0	0
interferon, beta 1, fibroblast	IFNB1	0	3.73553	0	4.52356
interferon, gamma	IFNG	0	0	0	0
interferon-induced protein 44	IFI44	1.36753	2.14076	-1.52416	1.6721
interferon-induced protein with tetratricopeptide repeats 1	IFIT1	1.9335	2.56514	-1.42416	1.53596
interferon-induced protein with tetratricopeptide repeats 2	IFIT2	1.87525	2.01401	0.257662	0.632897
interferon-induced protein with tetratricopeptide repeats 3	IFIT3	2.8514	2.44456	-0.474232	1.56636
interleukin 1 receptor accessory protein	IL1RAP	-0.546417	-0.438467	-0.666764	-0.87268
interleukin 1 receptor antagonist	IL1RN	0.257506	0.612721	-1.2666	-0.707952
interleukin 1 receptor, type I	IL1R1	-0.444054	-0.776962	-0.517551	-0.615569
interleukin 1, alpha	IL1A	7.165	9.7338	7.27829	9.87344
interleukin 1, beta	IL1B	4.58004	7.30188	3.30867	5.72792
interleukin 10	IL10	0	0	0	0
interleukin 10 receptor, beta	IL10RB	0.189071	0.304194	0.133886	0.379356
interleukin 11	IL11	0	3.20502	-1.29612	0
interleukin 12A (natural killer cell stimulatory factor 1, cytotoxic lymphocyte maturation factor 1, p35)	IL12A	-0.318523	2.6493	-2.15738	1.38136
interleukin 12B (natural killer cell stimulatory factor 2, cytotoxic lymphocyte maturation factor 2, p40)	IL12B	0	0	0	0
interleukin 13	IL13	0	1.62006	1.13874	0
interleukin 15	IL15	0.851402	0.598022	0.308288	0.615823
interleukin 17A	IL17A	0	0	0	0
interleukin 18 (interferon-gamma-inducing factor)	IL18	-0.261141	-0.341825	-0.362357	-0.461248
interleukin 18 receptor accessory protein	IL18RAP	0	0	0	0
interleukin 2	IL2	0	0	0	0
interleukin 21	IL21	0	0	0	0
interleukin 22	IL22	0	0	0	0
interleukin 22 receptor, alpha 2	IL22RA2	0	0	0	0
interleukin 23 receptor	IL23R	0	-1.29268	-1.29612	0
interleukin 23, alpha subunit p19	IL23A	0	4.73553	2.72371	5.04439
interleukin 3 (colony-stimulating factor, multiple)	IL3	0	0	0	0
interleukin 4	IL4	0	0	0	0
interleukin 5 (colony-stimulating factor, eosinophil)	IL5	0	0	0	0
interleukin 6 (interferon, beta 2)	IL6	5.98617	9.32925	5.89325	7.37744
interleukin 6 receptor	IL6R	-2.0872	-2.08766	-1.99868	-1.15469
interleukin 7	IL7	0	-1.87765	-2.29612	-1.10407
interleukin 8	IL8	5.50663	5.17536	5.40262	5.25682
interleukin 9	IL9	0	0	0	2.32193
jun proto-oncogene	JUN	0.302459	1.09356	0.195213	0.707206
kelch-like ECH-associated protein 1	KEAP1	-0.897059	0.42691	0.120159	0.0814867
kininogen 1	KNG1	0	0	0	0
leukotriene B4 receptor	LTB4R	0.644951	2.37468	1.06502	1.7704
leukotriene B4 receptor 2	LTB4R2	-1.8331	1.74241	-0.446882	-0.104069
LIM domain kinase 1	LIMK1	0.212668	-0.424238	0.0700353	-0.232077
lymphocyte antigen 96	LY96	0	-2.57952	0	3
lymphotoxin alpha (TNF superfamily, member 1)	LTA	0	0	0	0
lymphotoxin beta (TNF superfamily, member 3)	LTB	4.03255	8.59352	3.9461	5.761
major histocompatibility complex, class II, DR alpha	HLA-DRA	1.96546	0.770093	1.48209	1.27304
major histocompatibility complex, class II, DR beta 1	HLA-DRB1	1.57485	0.823131	1.05956	0.837716
mannan-binding lectin serine peptidase 1 (C4/C2 activating component of Ra-reactive factor)	MASP1	0	-1.40959	-0.296118	-2.84103
mannan-binding lectin serine peptidase 2	MASP2	0	0	0	0
mannose receptor, C type 1	MRC1	0	0	0	0
mannose-binding lectin (protein C) 2, soluble	MBL2	0	0	0	0
MAP kinase interacting serine/threonine kinase 1	MKNK1	-0.475027	0.164645	-0.346037	-0.278098
matrix metallopeptidase 3 (stromelysin 1, progelatinase)	MMP3	0	0	0	0
matrix metallopeptidase 9 (gelatinase B, 92kDa gelatinase, 92kDa type IV collagenase)	MMP9	0	0	0	0
MEF2BNB-MEF2B readthrough	MEF2BNB-MEF2B	-0.73356	0	0	0
mitogen-activated protein kinase 1	MAPK1	-0.313869	0.140713	-0.161886	0.0511805
mitogen-activated protein kinase 14	MAPK14	-0.268438	-0.00536885	-0.104065	0.105447
mitogen-activated protein kinase 3	MAPK3	-0.302184	-0.321153	-0.0321797	-0.311043
mitogen-activated protein kinase 8	MAPK8	0.23037	0.720192	0.195104	0.572234
mitogen-activated protein kinase kinase 1	MAP2K1	-0.0865762	0.567578	0.186468	0.215153
mitogen-activated protein kinase kinase 4	MAP2K4	-0.297461	0.255225	0.212381	0.56889
mitogen-activated protein kinase kinase 6	MAP2K6	-1.78801	-0.947248	-0.972951	-0.568737
mitogen-activated protein kinase kinase kinase 1, E3 ubiquitin protein ligase	MAP3K1	-0.123875	-0.029319	0.0941635	0.474699
mitogen-activated protein kinase kinase kinase 5	MAP3K5	-0.742663	0.435434	-0.157375	0.135002
mitogen-activated protein kinase kinase kinase 7	MAP3K7	-0.206018	0.239244	-0.291676	0.18516
mitogen-activated protein kinase kinase kinase 9	MAP3K9	-0.52711	0.742412	-0.3273	-0.0336796
mitogen-activated protein kinase-activated protein kinase 2	MAPKAPK2	0.133802	-0.179337	0.0715852	0.100751
mitogen-activated protein kinase-activated protein kinase 5	MAPKAPK5	-0.104123	0.149376	0.131638	0.163344
MYC associated factor X	MAX	-0.332198	0.590409	0.0265588	0.209089
myeloid differentiation primary response gene (88)	MYD88	-0.0928101	0.191719	-0.175637	0.112065
myocyte enhancer factor 2A	MEF2A	-0.197178	0.0765295	0.0501641	0.121175
myocyte enhancer factor 2C	MEF2C	-1.11207	-1.88003	-1.01378	-1.1319
myocyte enhancer factor 2D	MEF2D	-0.250619	0.320388	-0.263634	-0.0315564
myosin, light chain 2, regulatory, cardiac, slow	MYL2	0	0	0	0
myxovirus (influenza virus) resistance 1, interferon-inducible protein p78 (mouse)	MX1	2.60263	2.98446	-1.5174	1.84849
myxovirus (influenza virus) resistance 2 (mouse)	MX2	5.88115	3.26597	-1.3418	2.20336
NADPH oxidase 1	NOX1	3.65404	1.62006	0	0
nitric oxide synthase 2, inducible	NOS2	0	0	-1.29612	0
NLR family, pyrin domain containing 3	NLRP3	0	0	0	0
nuclear factor (erythroid-derived 2)-like 2	NFE2L2	-0.00526368	0.467517	0.348124	0.669352
nuclear factor of activated T-cells, cytoplasmic, calcineurin-dependent 3	NFATC3	-0.529361	-0.121811	-0.197854	-0.125443
nuclear factor of kappa light polypeptide gene enhancer in B-cells 1	NFKB1	1.38673	2.54182	1.08363	1.85234
nuclear receptor subfamily 3, group C, member 1 (glucocorticoid receptor)	NR3C1	-0.119181	0.164072	0.044834	0.232782
nucleotide-binding oligomerization domain containing 1	NOD1	0.588368	0.458619	-0.301765	-0.499998
nucleotide-binding oligomerization domain containing 2	NOD2	0	3.01543	3.13874	1.74393
oxoeicosanoid (OXE) receptor 1	OXER1	0	0	0	0
phosphatidylinositol-4-phosphate 3-kinase, catalytic subunit type 2 gamma	PIK3C2G	-0.9315	-0.976687	-0.237865	-0.962515
phospholipase A2, group IVA (cytosolic, calcium-dependent)	PLA2G4A	0.244072	0.601814	0.517224	0.509463
phospholipase C, beta 1 (phosphoinositide-specific)	PLCB1	0.409398	-0.469092	-0.280758	-0.689031
platelet-derived growth factor alpha polypeptide	PDGFA	-0.540915	0.52002	-0.572413	-0.519106
prostaglandin D2 receptor 2	PTGDR2	0	0	0	0
prostaglandin E receptor 1 (subtype EP1), 42kDa	PTGER1	0	0	0	0
prostaglandin E receptor 2 (subtype EP2), 53kDa	PTGER2	0	0.479378	0	3.98339
prostaglandin E receptor 3 (subtype EP3)	PTGER3	0	0	0	0
prostaglandin E receptor 4 (subtype EP4)	PTGER4	1.3539	-0.579516	-0.92291	0.615823
prostaglandin F receptor (FP)	PTGFR	0	0.479378	-1.29612	2
prostaglandin I2 (prostacyclin) receptor (IP)	PTGIR	0	0	0	0
prostaglandin-endoperoxide synthase 1 (prostaglandin G/H synthase and cyclooxygenase)	PTGS1	0	-1.29268	-3.29612	0
prostaglandin-endoperoxide synthase 2 (prostaglandin G/H synthase and cyclooxygenase)	PTGS2	4.01463	3.59305	3.96628	4.64713
protein kinase C, alpha	PRKCA	0.26644	0.138929	-0.0157141	-0.0732629
protein kinase C, beta	PRKCB	0	0	0	0
protein phosphatase 1, regulatory subunit 12B	PPP1R12B	-0.0173534	-0.0434632	-0.437483	0.480894
PTK2 protein tyrosine kinase 2	PTK2	-0.163954	0.290531	0.0410208	0.184955
Rap guanine nucleotide exchange factor (GEF) 2	RAPGEF2	-0.00657891	0.135754	-0.70839	-0.244931
ras homolog family member A	RHOA	-0.158866	-0.069961	-0.458545	-0.175962
ras-related C3 botulinum toxin substrate 1 (rho family, small GTP binding protein Rac1)	RAC1	0.0950382	0.480018	0.0289624	0.136071
receptor (TNFRSF)-interacting serine-threonine kinase 1	RIPK1	0.0405582	0.456503	-0.0423586	0.0865098
receptor-interacting serine-threonine kinase 2	RIPK2	0.637174	2.19871	0.70377	1.53753
Rho-associated, coiled-coil containing protein kinase 2	ROCK2	-0.380121	0.122328	-0.263053	-0.0511642
ribosomal protein S6 kinase, 90kDa, polypeptide 5	RPS6KA5	-0.483017	-0.493216	0.113272	0.439553
SHC (Src homology 2 domain containing) transforming protein 1	SHC1	-0.167963	0.62163	-0.387495	0.150296
signal transducer and activator of transcription 1, 91kDa	STAT1	0.6627	1.44859	-0.930647	1.02072
signal transducer and activator of transcription 2, 113kDa	STAT2	-0.023067	0.905836	-0.486463	0.106576
signal transducer and activator of transcription 3 (acute-phase response factor)	STAT3	0.563251	0.658097	0.58063	0.714306
SMAD family member 7	SMAD7	0.147795	-0.164479	0.676947	1.1354
thromboxane A2 receptor	TBXA2R	0	0	0	0
thymic stromal lymphopoietin	TSLP	0	0	0	0
TNF receptor-associated factor 2	TRAF2	0.203014	1.02505	0.365722	0.828186
TNFRSF1A-associated via death domain	TRADD	0.140909	1.30429	-0.301765	0.300321
toll interacting protein	TOLLIP	-0.2329	0.299664	-0.116961	0.0647799
toll-like receptor 1	TLR1	0.39197	0.0938844	0.290084	0.381358
toll-like receptor 2	TLR2	2.02543	2.297	2.70392	2.50535
toll-like receptor 3	TLR3	0.195181	0.674849	0.266432	0.713601
toll-like receptor 4	TLR4	0	0	0	0
toll-like receptor 5	TLR5	0.153058	-0.169051	0.453449	0.0255664
toll-like receptor 6	TLR6	1.33211	0	-1.88108	0
toll-like receptor 7	TLR7	0	0	0	0
toll-like receptor 8	TLR8	0	0	0	0
toll-like receptor 9	TLR9	0	0	0	1.58496
transcription factor 4	TCF4	0	0	0	0
transforming growth factor, beta 1	TGFB1	-0.468857	-0.89883	-0.65119	-0.262896
transforming growth factor, beta 2	TGFB2	-0.666446	-0.526077	-0.179628	0.466595
transforming growth factor, beta 3	TGFB3	0	0	0	1
transforming growth factor, beta receptor 1	TGFBR1	0.411211	0.786419	-0.00814922	0.0225645
triggering receptor expressed on myeloid cells 2	TREM2	0	0	0	0
tumor necrosis factor	TNF	4.58004	8.38824	5.6306	7.12475
tumor necrosis factor (ligand) superfamily, member 14	TNFSF14	0	0	0	0
tumor necrosis factor, alpha-induced protein 3	TNFAIP3	3.44398	4.39141	2.95305	4.32036
twist homolog 2 (Drosophila)	TWIST2	0	0	0	0
TYRO protein tyrosine kinase binding protein	TYROBP	0	0	0	0
v-Ha-ras Harvey rat sarcoma viral oncogene homolog	HRAS	-0.657612	-0.257588	-0.354412	0.68948
v-maf musculoaponeurotic fibrosarcoma oncogene homolog F (avian)	MAFF	1.55767	1.10846	0.401592	1.25111
v-maf musculoaponeurotic fibrosarcoma oncogene homolog G (avian)	MAFG	-0.117901	0.933554	-0.0943654	0.107907
v-maf musculoaponeurotic fibrosarcoma oncogene homolog K (avian)	MAFK	-0.136658	0.905047	-0.143591	0.423414
v-myc myelocytomatosis viral oncogene homolog (avian)	MYC	-0.0863696	0.373017	-0.0891344	0.161034
v-raf-1 murine leukemia viral oncogene homolog 1	RAF1	-0.126572	0.422794	-0.00718229	0.190243
v-rel reticuloendotheliosis viral oncogene homolog A (avian)	RELA	0.397684	0.850788	0.0755096	0.0327098
v-rel reticuloendotheliosis viral oncogene homolog B	RELB	1.89322	2.56769	1.60092	1.95634
Interleukins
Chemokines, colony stimulating factors
Toll like receptors
