# Supplementary material for: Combined Bacteriophage and Antibiotic Treatment Prevents Pseudomonas aeruginosa Infection of Wild Type and cftr- Epithelial Cells
Source: Front Microbiol. 2020 Aug 26;11:1947. doi: 10.3389/fmicb.2020.01947 (PMC7479825; doi:10.3389/fmicb.2020.01947)
Supplement: Supplementary file 2 [file Data_Sheet_2.xlsx]

## Sheet: Feuil1
Table S3. List of P. aeruginosa strains used to test host range of phages F24,F54 and F69 and EOP.
			Efficiency of plating
Strain	Source	Reference	F24	F54	F69
PAO1	Wound	n.a.	1	1	1
ATCC 15442-MINI	Animal room water bottle	ATCC	1	360	0.2
Muco 1	Sputum (CF)	this study	0	0	2.5e-06
Muco 2	Sputum (CF)	this study	1.42857e-06	0	5e-05
Muco 3	Sputum (CF)	this study	7.14286e-06	1	5e-05
Muco 4	Sputum (CF)	this study	0	0.001	0
Muco 5	Sputum (CF)	this study	0	0	0
Muco 6	Sputum (CF)	this study	0	0	0
Muco 7	Sputum (CF)	this study	0	0	0
Muco 8	Sputum (CF)	this study	0	0	0
Muco 9	Sputum (CF)	this study	0	0.012	0.005
Muco 10	Sputum (CF)	this study	0	0.002	0.2
Muco 11	Sputum (CF)	this study	0	0.002	0.001
Muco 12	Sputum (CF)	this study	0	0	0
Muco 13	Sputum (CF)	this study	0	0	0
Muco 14	Sputum (CF)	this study	0	4e-05	0
Muco 15	Sputum (CF)	this study	0.0714286	0.002	0.25
Muco 16	Sputum (CF)	this study	1	360	0.75
Muco 17	Sputum (CF)	this study	1.14286	480	0.75
Muco 19	Sputum (CF)	this study	0.142857	0	0.002
Muco 21	Sputum (CF)	this study	1.14286	0.012	0
Muco 25	Sputum (CF)	this study	0.714286	80	0.225
Muco 27	Sputum (CF)	this study	0	0	0
Muco 34	Sputum (CF)	this study	0	0	0
Muco 36	Sputum (CF)	this study	0	0.008	0.0002
Muco 37	Sputum (CF)	this study	0	0.004	0.025
Muco 38	Sputum (CF)	this study	0	0.0016	0
Muco 39	Sputum (CF)	this study	0	0.0024	0
Muco 40	Sputum (CF)	this study	0	0	0
Muco 47	Sputum (CF)	this study	0	240	0.05
Muco 50	Sputum (CF)	this study	0	0	0
1708502498	Otitis media	this study	0	0	0.002
1708502499	Otitis media	this study	5.71429e-08	0	0
10B	Blood	this study	0	0	0
24	Blood	this study	0	0	0
62A	Blood	this study	1.28571	0	0.35
62B	Blood	this study	1.57143	0.012	0.75
73A	Blood	this study	0	0.008	0.75
79A	Blood	this study	0	0	0
81B	Blood	this study	0.0428571	0.002	0.5
120	Blood	this study	0.714286	0	0.75
143	Blood	this study	0	0	0
150B C1	Blood	this study	0	0	0
150B C2	Blood	this study	0	0	0
159	Blood	this study	0.142857	840	0.15
164	Blood	this study	0	0	0.001
198B	Blood	this study	0	0	0
174	Blood	this study	1.14286	0	0.175
179	Blood	this study	0	0	0
216	Blood	this study	0	480	0.000125
M1 1105 0395	Burn wound	this study	0.428571	0	0.75
M1 1119 0828	Burn wound	this study	0	0	0
M1 1115 2044	Burn wound	this study	0	0	0
M1 1109 2312	Burn wound	this study	0.0714286	0	0.15
PA14	n.a.	this study	0	0	0.175
TC	n.a.	this study	0.0142857	0.012	0
UR 1156	n.a.	this study	0	0	0
392	n.a.	this study	0	0	0.15
393	n.a.	this study	0	0	0.005
395	n.a.	this study	0	0	0.2
398	n.a.	this study	0	0.002	0.2
401	n.a.	this study	0	8e-05	0
2062	n.a.	this study	0.00357143	0	1
3292	n.a.	this study	0.00357143	0.0016	7.5
PA1A	n.a.	this study	0	2.4e-05	1
PA2A	n.a.	this study	0	0	0.000625
PA3A	n.a.	this study	0	320	0.5
PA4A	n.a.	this study	0	0.0004	1
PA5A	n.a.	this study	0	240	0.75
PA6A	n.a.	this study	0	0	0
PA8A	n.a.	this study	0	3.6e-05	0.325
PA33A	n.a.	this study	0	0	0.05
PA34A	n.a.	this study	0	4.8e-05	0.5
PA49A	n.a.	this study	0	0	0
PA50A	n.a.	this study	0	0	0.175
PA54A	n.a.	this study	0	0	6.25e-08
PA55A	n.a.	this study	1.85714e-07	0	0
PA56A	n.a.	this study	0	0	0.001
PA61A	n.a.	this study	0	0.0028	0.0015
PA63A	n.a.	this study	0	0.0016	0.001
PA66A	n.a.	this study	0.571429	0	0.005
PA67A	n.a.	this study	0	0	0
PA70A	n.a.	this study	0	0	0
PA71A	n.a.	this study	0.571429	0	0.1
PA72A	n.a.	this study	0	0.008	0
PA73A	n.a.	this study	0	0	0
PA75A	n.a.	this study	0	0	0.0125
PA80A	n.a.	this study	0	0	0.0175
PA83A	n.a.	this study	0.0142857	0	0.0175
PA84A	n.a.	this study	0	0	0
PA87A	n.a.	this study	0	0	0
PA88A	n.a.	this study	0	0	0
PA89A	n.a.	this study	0	0	0
PA90A	n.a.	this study	0.0142857	0	0.0175
PA91A	n.a.	this study	0	0	0
PA92A	n.a.	this study	0	0	0
PA93A	n.a.	this study	0	0	0.001
PA94A	n.a.	this study	0	0	0
1905-500896	n.a.	this study	0	0	0
1908-502468	n.a.	this study	0	0	0
n.a., not available; CF, Cystic Fibrosis; ATCC, American Type Culture Collection
number in italics indicate turbid lysis
EOP, Efficiency of Plating; reference EOP on PAO1 (set to 1) is indicated in bold and
calculated as described in Mirzaei and Nilsson (2015) PLoS One 10(3):e0118557. doi:10.1371/journal.pone.0118557
